# Supplementary material
Source: PubMed Central journal article supplement (PMC3347218)
Supplement: supp_194.10.2573_TableS1-S3_FigS1-S3.pdf [file supp_194.10.2573_TableS1-S3_FigS1-S3.pdf]

**Supplemental Tables 1 and 2**  
**King et al.**

**Orientation of *Pseudomonas aeruginosa* ExsA monomers bound to promoter DNA  
and base-specific contacts with the P<sub>exoT</sub> promoter**

**Table S1. Bacterial strains, reporters, and plasmids used in this study.**

| Bacterial strains    | Relevant characteristics                        | Reference |
|----------------------|-------------------------------------------------|-----------|
| PA103                | wt strain, burn wound isolate                   | (3)       |
| PA103 <i>exsA::Ω</i> | chromosomal interposon insertion in <i>exsA</i> | (2)       |

| Reporter fusions             | Integration Plasmid                                   | Experiment            | Primer Pair       | Reference  |
|------------------------------|-------------------------------------------------------|-----------------------|-------------------|------------|
| <i>P<sub>exsD-lacZ</sub></i> | mini-CTX- <i>P<sub>exsD-lacZ</sub></i> (-152 to + 16) | Fig. 2A               | NA                | (4)        |
| <i>P<sub>exoT-lacZ</sub></i> | mini-CTX- <i>P<sub>exoT-lacZ</sub></i> (-179 to + 17) | Fig. 3-6, S2          | NA                | (1)        |
| EB127                        | mini-CTX- <i>P<sub>exoT-lacZ</sub></i> (C45A)         | Fig. 3C, 4B, 5, 7, S2 | NA                | (1)        |
| EB134                        | mini-CTX- <i>P<sub>exoT-lacZ</sub></i> (G47A)         | Fig. 3C, 4B, 5, 7, S2 | NA                | (1)        |
| EB150                        | mini-CTX- <i>P<sub>exoT-lacZ</sub></i> (A34C)         | Fig. 3D, 4B, 5, 7, S2 | 50405766-43613960 | This study |
| EB126                        | mini-CTX- <i>P<sub>exoT-lacZ</sub></i> (C50G)         | Fig. 4, 5, 7, S2      | NA                | (1)        |
| EB135                        | mini-CTX- <i>P<sub>exoT-lacZ</sub></i> (T38A)         | Fig. 4, 5, 7, S2      | NA                | (1)        |
| EB136                        | mini-CTX- <i>P<sub>exoT-lacZ</sub></i> (G37C)         | Fig. 4, 5, 7, S2      | NA                | (1)        |
| EB137                        | mini-CTX- <i>P<sub>exoT-lacZ</sub></i> (A34T)         | Fig. 4, 5, 7, S2      | NA                | (1)        |
| JK121                        | mini-CTX- <i>P<sub>exoT-lacZ</sub></i> (C39A)         | Fig. 4, 5, 7, S2      | 79346690-43613960 | This study |
| JK122                        | mini-CTX- <i>P<sub>exoT-lacZ</sub></i> (A36C)         | Fig. 4, 5, 7, S2      | 79346689-43613960 | This study |
| JK123                        | mini-CTX- <i>P<sub>exoT-lacZ</sub></i> (T35G)         | Fig. 4, 5, 7, S2      | 79346688-43613960 | This study |
| <i>P<sub>exsC-lacZ</sub></i> | mini-CTX- <i>P<sub>exsC-lacZ</sub></i> (-186 to + 17) | Fig. 4B, 6A-B         | NA                | (4)        |

| Expression Plasmids                       | Experiment              | Primer or Primer Pair | Reference  |
|-------------------------------------------|-------------------------|-----------------------|------------|
| pJN105                                    | Fig. 2A, 3B-D, 4C, 6A-B | NA                    | (5)        |
| pEB124 (wt <i>exsA</i> expression vector) | Fig. 2A                 | NA                    | (1)        |
| pEB124 $\Delta$ cys                       | Fig. 2A                 | multiple              | This study |
| pEB124 $\Delta$ cys E193C                 | Fig. 2A                 | 38799024              | This study |
| pEB124 $\Delta$ cys M196C                 | Fig. 2A                 | 38799023              | This study |
| pEB124 $\Delta$ cys G244C                 | Fig. 2A                 | 38799022              | This study |
| pEB124 $\Delta$ cys S246C                 | Fig. 2A                 | 38799021              | This study |
| pET16b <i>exsA</i>                        | Fig. 2B, 8              | NA                    | (1)        |
| pET16b <i>exsA</i> $\Delta$ cys M196C     | Fig. 2B                 | NA                    | This study |
| pET16b <i>exsA</i> $\Delta$ cys S246C     | Fig. 2B                 | NA                    | This study |
| pEB124 K202R                              | Fig. 3B                 | Isolated from screen  | This study |

Table S1 (continued)

| Expression Plasmids      | Experiment      | Primer or Primer Pair | Reference  |
|--------------------------|-----------------|-----------------------|------------|
| pEB124 T199S             | Fig. 3C         | 47632614              | This study |
| pEB124 T252S             | Fig. 3D         | 51494557              | This study |
| pEB124 K202A             | Fig. 4C, 5      | 51222351-42148424     | This study |
| pEB124 T199A             | Fig. 4C, 5      | 51222353-42148424     | This study |
| pEB124 T252A             | Fig. 4C, 5      | 51494557-42148424     | This study |
| pEB124 L198A             | Fig. 6A, 7      | 51222354-42148424     | This study |
| pEB124 T200A             | Fig. 6A, S2     | 51222352-42148424     | This study |
| pEB124 E203A             | Fig. 6A         | Isolated from screen  | This study |
| pEB124 L204A             | Fig. 6A, S2     | 51222350-42148424     | This study |
| pEB124 G206A             | Fig. 6A         | 51222349-42148424     | This study |
| pEB124 S207A             | Fig. 6A         | 51222348-42148424     | This study |
| pEB124 V208A             | Fig. 6A, S2     | 51222347-42148424     | This study |
| pEB124 Q248A             | Fig. 6B, 7      | 51222346-42148424     | This study |
| pEB124 S249A             | Fig. 6B, S2     | 43687091-42148424     | This study |
| pEB124 Y250A             | Fig. 6B, 7      | 51494559-42148424     | This study |
| pEB124 Q253A             | Fig. 6B         | 43687088-42148424     | This study |
| pEB124 S254A             | Fig. 6B         | 51222345-42148424     | This study |
| pEB124 R256A             | Fig. 6B, S2     | 51222344-42148424     | This study |
| pEB124 R257A             | Fig. 6B, 7      | 51222343-42148424     | This study |
| pEB124 R258A             | Fig. 6B, S2     | 51222342-42148424     | This study |
| pET16b <i>exsA</i> L198A | Fig. 8, Table 1 | 42308574-80815243     | This study |
| pET16b <i>exsA</i> T199A | Fig. 8, Table 1 | 42308574-80815243     | This study |
| pET16b <i>exsA</i> K202A | Fig. 8, Table 1 | 42308574-80815243     | This study |
| pET16b <i>exsA</i> Q248A | Fig. 8, Table 1 | 42308574-80815243     | This study |
| pET16b <i>exsA</i> Y250A | Fig. 8, Table 1 | 42308574-80815243     | This study |
| pET16b <i>exsA</i> T252A | Fig. 8, Table 1 | 42308574-80815243     | This study |
| pET16b <i>exsA</i> R257A | Fig. 8, Table 1 | 42308574-80815243     | This study |

**Table S2. Primers used in this study.**

| <u>Primer ID</u>                         | <u>Name</u>                 | <u>Primer sequence</u>                                       |
|------------------------------------------|-----------------------------|--------------------------------------------------------------|
| 3242037                                  | pD5'Hind10-15               | 5'-ACAGAAGCTTTTCCAGCCAGTCCTATTTTACC                          |
| 22963127                                 | P <sub>exsC</sub> Hind for  | 5'-ACGCAAGCTTATGAAGGACGTCCTGCAGCTCATCC                       |
| 28433493                                 | UY133B                      | 5'-TTTGAATTCGGTGTATTTCGTTTCATGTCGCCC                         |
| 28433494                                 | UY133A                      | 5'-ATATAAGCTTCGGAGGCCACGCTCGATACGC                           |
| 29590679                                 | AinternalstartXba5'         | 5'-CTGCACTCTAGAGCGGGGCATTCAAGGTACGACGGGAAGTGTGG              |
| 29690545                                 | EB126                       | 5'-CGATCTAAGCTTGATAAAAAAACGACGGCCAATCCTGATAGGCGGAGGGGCGCCTCG |
| 31216337                                 | EB127                       | 5'-AAAAAAACCACGGACAATCCTGATAGGCGGAGGGGC                      |
| 31216338                                 | P <sub>exoT</sub> Hind for  | 5'-CGAGTAAGCTTGCCAATATCCCATCGGGTTCTCCGCCCCGG                 |
| 31590566                                 | EB137                       | 5'-AAAAAAACCACGGCCAATCCTGATTGGCGGAGGGGC                      |
| 31590567                                 | EB136                       | 5'-AAAAAAACCACGGCCAATCCTCATAGGCGGAGGGGC                      |
| 31590568                                 | EB135                       | 5'-AAAAAAACCACGGCCAATCCAGATAGGCGGAGGGGC                      |
| 31590569                                 | EB134                       | 5'-AAAAAAACCACAGCCAATCCTGATAGGCGGAGGGGC                      |
| 42148424                                 | exsA3'SacI                  | 5'-GTGCGAGCTCCTCGTCAGAGCCTGCAATTTGG                          |
| 42308574                                 | exsA5'Nde                   | 5'-GTCACATATGCAAGGAGCCAATC                                   |
| 43613960                                 | P <sub>exoT</sub> EcoR1 rev | 5'-CGACGAATTCGACGTCTCCTGATGTTTCCCCGCCAGTCTAGGAACG            |
| 49188918                                 | pC3'EcoRI                   | 5'-TGATGAATTCGCCTCCTAAAGCTCAGCGCATGC                         |
| 49865141                                 | pD3'Eco(2)                  | 5'-CGACTCGAATTCTCTGCCTTGGCTTCTCACTAC                         |
| 50405765                                 | MPpT(A26G)                  | 5'-AAAAAAACCACGGCCAATCCTGATGGGCGGAGGGGC                      |
| 79346688                                 | minictxJK123                | 5'-AAAAAAACCACGGCCAATCCTGAGAGGCGGA                           |
| 79346689                                 | minictxJK122                | 5'-AAAAAAACCACGGCCAATCCTGCTAGGCGGA                           |
| 79346690                                 | minictxJK121                | 5'-AAAAAAACCACGGCCAATCATGATAGGCGGA                           |
| 80815243                                 | exsA3'BamI                  | 5'-GTGCGGATCCCTCGTCAGAGCCTGCAATTTG                           |
| <i>Site-directed mutagenesis of exsA</i> |                             |                                                              |
| 36672411                                 | ExsA (C15A)                 | 5'-TGGCCGAAAGCAGATAACGTCTGCTCATTGGAACATTCCAA                 |
| 36672410                                 | ExsA (C50A)                 | 5'-CAGGACATCGATTCCACTTTTGCCTGGCGCCTG                         |
| 36672409                                 | ExsA (C102A)                | 5'-GTTGAGTGAAGTCGAGCGTGCCGACGAGCCCG                          |
| 36672408                                 | ExsA (C121A)                | 5'-CCTCTGCTGGCCGGTGCCGTCAAGGGGTTG                            |
| 36672407                                 | ExsA (C139A)                | 5'-CGCCGATGCTCGCCGCCCTGAAGATCGAGG                            |
| 36672406                                 | ExsA (C261A)                | 5'-CCGCCGTTTCGGCGCCACACCGAGCCGC                              |
| 36672405                                 | ExsA (C271A)                | 5'-GCGGCAGGGGAAGGACGAAGCCCGGGCTAAA                           |

Table S2 (continued)

| <u>Primer ID</u>                                   | <u>Name</u>   | <u>Primer sequence</u>                                            |
|----------------------------------------------------|---------------|-------------------------------------------------------------------|
| 38799021                                           | ExsA (S246C)  | 5'-ATGGAGGCGGGCTTTT <u>IGCAGCCAGTCCTATTT</u> CACCC                |
| 38799022                                           | ExsA (G244C)  | 5'-CGCCATGGAGGCGT <u>IGCTTTT</u> CCAGCCAGTCC                      |
| 38799023                                           | ExsA (M196C)  | 5'-CCGCGAGTTCGGCT <u>TGCGGG</u> GCTGACCACC                        |
| 38799024                                           | ExsA (E193C)  | 5'-CGACTTCTCCCGCT <u>TGCTT</u> CGGCATGGGGC                        |
| 47632614                                           | A-T199S-top   | 5'-CGGCATGGGGCTGAGCACCTTCAAGGAGC                                  |
| 51494557                                           | ExsA_T252Stop | 5'-CCAGCCAGTCCTATTT <u>CAGCCAGAGCTATCGCCGCCGTTT</u> CGGC          |
| <i>RH1 and RH2 directed mutagenesis</i>            |               |                                                                   |
| 42128175                                           | Mp_exsA_S254  | 5'-CCAGCCAGTCCTATTT <u>CACCCAGNNNTATCGCCGCCGTTT</u> CGGC          |
| 42128176                                           | Mp_exsA_Q253  | 5'-CCAGCCAGTCCTATTT <u>CACNNN</u> AGCTATCGCCGCCGTTT <u>CGGC</u>   |
| 42128177                                           | Mp_exsA_T252  | 5'-CCAGCCAGTCCTATTT <u>CNNNCAGAGCTATCGCCGCC</u>                   |
| 42128178                                           | Mp_exsA_Y250  | 5'-GGAGGCGGGCTTTTT <u>CCAGCCAGTCCNNNTT</u> CACCCAGAGCTATCGCC      |
| 42128179                                           | Mp_exsA_S249  | 5'-GGAGGCGGGCTTTTT <u>CCAGCCAGNNNTATTT</u> CACCCAGAGC             |
| 42128180                                           | Mp_exsA_Q248  | 5'-GGAGGCGGGCTTTTT <u>CCAGCNNNTCCTATTT</u> CACCCAGAGC             |
| 42128181                                           | Mp_exsA_L204  | 5'-CGGCATGGGGCTGACCACCTTCAAGGAG <u>NNNTT</u> CGGCAGTGTCTACGGGG    |
| 42128182                                           | Mp_exsA_E203  | 5'-CGGCATGGGGCTGACCACCTTCAAG <u>NNNCTGTT</u> CGGCAGTGTCTACGGGG    |
| 42128183                                           | Mp_exsA_K202  | 5'-CGGCATGGGGCTGACCACCTT <u>CNNN</u> AGCTGTTCGGCAGTGTCTACGGGG     |
| 42128184                                           | Mp_exsA_T200  | 5'-CGGCATGGGGCTGACC <u>NNNTT</u> CAAGGAGCTGTTCGGC                 |
| 42128185                                           | Mp_exsA_T199  | 5'-CCCGCGAGTTCGGCATGGGGCTG <u>NNNACCTT</u> CAAGGAGCTGTTCGGC       |
| 42128186                                           | Mp_exsA_L198  | 5'-CCCGCGAGTTCGGCATGGGG <u>NNNACCACCTT</u> CAAGGAGCTGTTCGGC       |
| <i>Alanine scanning mutagenesis of RH1 and RH2</i> |               |                                                                   |
| 43687088                                           | Mp_exsA_Q253  | 5'-CCAGCCAGTCCTATTT <u>CACCGCCAGCTATCGCCGCCGTTT</u> CGGC          |
| 43687089                                           | Mp_exsA_T252  | 5'-CCAGCCAGTCCTATTT <u>CGCCAGAGCTATCGCCGCC</u>                    |
| 43687090                                           | Mp_exsA_Y250  | 5'-GGAGGCGGGCTTTTT <u>CCAGCCAGTCCGCCTT</u> CACCCAGAGCTATCGCC      |
| 43687091                                           | Mp_exsA_S249  | 5'-GGAGGCGGGCTTTTT <u>CCAGCCAGGCCTATTT</u> CACCCAGAGC             |
| 51222346                                           | Mp_exsA_Q248  | 5'-GGAGGCGGGCTTTTT <u>CCAGCGCCTCCTATTT</u> CACCCAGAGC             |
| 51222347                                           | Mp_exsA_V208  | 5'-CCACCTTCAAGGAGCTGTT <u>CGGCAGTGCCTACGGGGTTT</u> CGCCGCGCGCCTGG |
| 51222348                                           | Mp_exsA_S207  | 5'-CCACCTTCAAGGAGCTGTT <u>CGGCAGTGCCTACGGGGTTT</u> CGCCGCGCGCCTGG |
| 51222349                                           | Mp_exsA_G206  | 5'-CCACCTTCAAGGAGCTGTT <u>CGCCAGTGTCTACGGGGTTT</u> CGCCGCGCGCCTGG |
| 51222350                                           | Mp_exsA_L204  | 5'-CGGCATGGGGCTGACCACCTTCAAGGAGGCCTT <u>CGGCAGTGTCTACGGGG</u>     |

Table S2 (continued)

| <u>Primer ID</u> | <u>Name</u>  | <u>Primer sequence</u>                                       |
|------------------|--------------|--------------------------------------------------------------|
| 51222351         | Mp_exsA_K202 | 5'-CGGCATGGGGCTGACCACCTTCGCCGAGCTGTTTCGGCAGTGTCTACGGGG       |
| 51222352         | Mp_exsA_T200 | 5'-CGGCATGGGGCTGACCGCCTTCAAGGAGCTGTTTCGGC                    |
| 51222353         | Mp_exsA_T199 | 5'-CCCGCGAGTTCGGCATGGGGCTGGCCACCTTCAAGGAGCTGTTTCGGC          |
| 51222354         | Mp_exsA_L198 | 5'-CCCGCGAGTTCGGCATGGGGGCCACCACCTTCAAGGAGCTGTTTCGGC          |
| 51222342         | Mp_exsA_R258 | 5'-GCCAGTCCTATTTACCCAGAGCTATCGCCGCGCCTTTCGGCTGCACACCGAGCCGC  |
| 51222343         | Mp_exsA_R257 | 5'-GCCAGTCCTATTTACCCAGAGCTATCGCGCCCGTTTTCGGCTGCACACCGAGCCGC  |
| 51222344         | Mp_exsA_R256 | 5'-GCCAGTCCTATTTACCCAGAGCTATGCCCGCCCGTTTTCGGCTGCACACCGAGCCGC |
| 51222345         | Mp_exsA_S254 | 5'-CCAGCCAGTCCTATTTACCCAGGCCTATCGCCGCCGTTTTCGGC              |

**Table S3. Activity of alanine substitution mutants**

| ExsA  | - Arabinose | + Arabinose    |
|-------|-------------|----------------|
| None  | 25 ± 3      | 28 ± 4         |
| wt    | 803 ± 52    | 37,849 ± 8,125 |
| L198A | 71 ± 11     | 8,524 ± 449    |
| T199A | 59 ± 3      | 5,215 ± 792    |
| T200A | 169 ± 38    | 9,835 ± 467    |
| K202A | 33 ± 2      | 877 ± 119      |
| L204A | 116 ± 9     | 5,194 ± 710    |
| V208A | 182 ± 10    | 12,477 ± 823   |
| Q248A | 35 ± 1      | 731 ± 14       |
| S249A | 124 ± 46    | 9,622 ± 717    |
| Y250A | 40 ± 2      | 743 ± 7        |
| T252A | 20 ± 1      | 83 ± 1         |
| R256A | 79 ± 3      | 8,263 ± 243    |
| R257A | 28 ± 3      | 123 ± 18       |
| R258A | 112 ± 4     | 8,070 ± 275    |

PA103 *exsA::Ω* carrying the wt *P<sub>exoT-lacZ</sub>* reporter and either a vector control (none) or vectors expressing wt ExsA or the indicated alanine-substitution mutants were cultured in TSB with EGTA in the absence or presence of 0.1% arabinose. The reported values are β-galactosidase activity in Miller units.

**REFERENCES**

1. **Brutinel, E. D., C. A. Vakulskas, K. M. Brady, and T. L. Yahr.** 2008. Characterization of ExsA and of ExsA-dependent promoters required for expression of the *Pseudomonas aeruginosa* type III secretion system. *Mol Microbiol* **68**:657-671.
2. **Frank, D. W., G. Nair, and H. P. Schweizer.** 1994. Construction and characterization of chromosomal insertional mutations of the *Pseudomonas aeruginosa* exoenzyme S trans-regulatory locus. *Infect Immun* **62**:554-563.
3. **Liu, P. V.** 1966. The roles of various fractions of *Pseudomonas aeruginosa* in its pathogenesis. 3. Identity of the lethal toxins produced in vitro and in vivo. *The Journal of infectious diseases* **116**:481-489.
4. **McCaw, M. L., G. L. Lykken, P. K. Singh, and T. L. Yahr.** 2002. ExsD is a negative regulator of the *Pseudomonas aeruginosa* type III secretion regulon. *Mol Microbiol* **46**:1123-1133.
5. **Newman, J. R., and C. Fuqua.** 1999. Broad-host-range expression vectors that carry the L-arabinose-inducible *Escherichia coli* araBAD promoter and the araC regulator. *Gene* **227**:197-203.



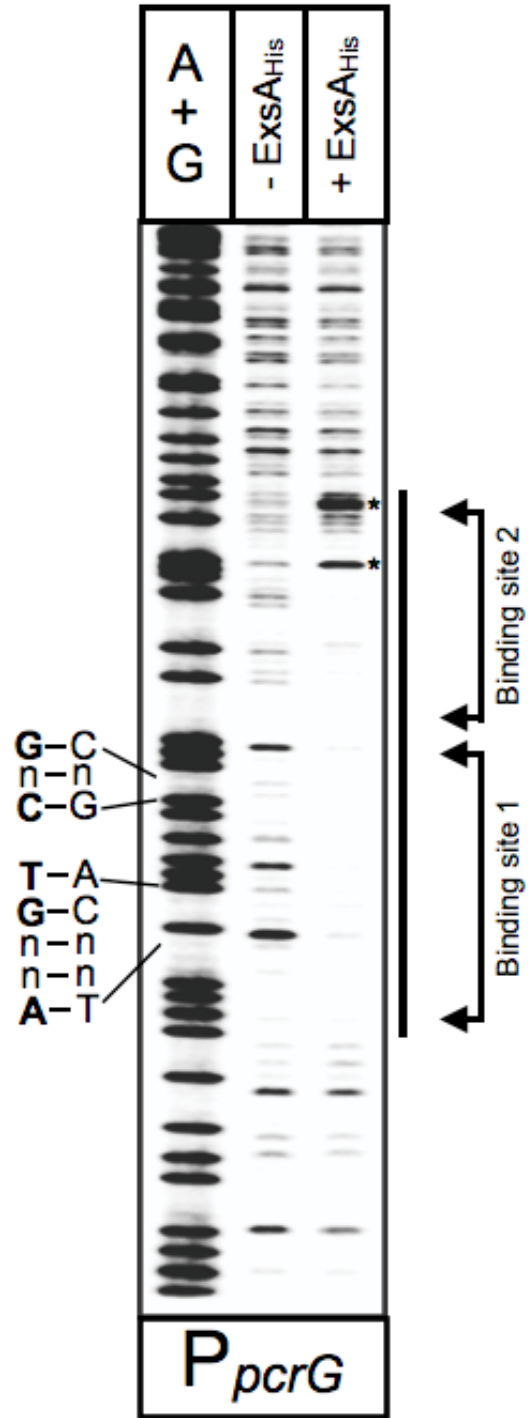

Figure S1

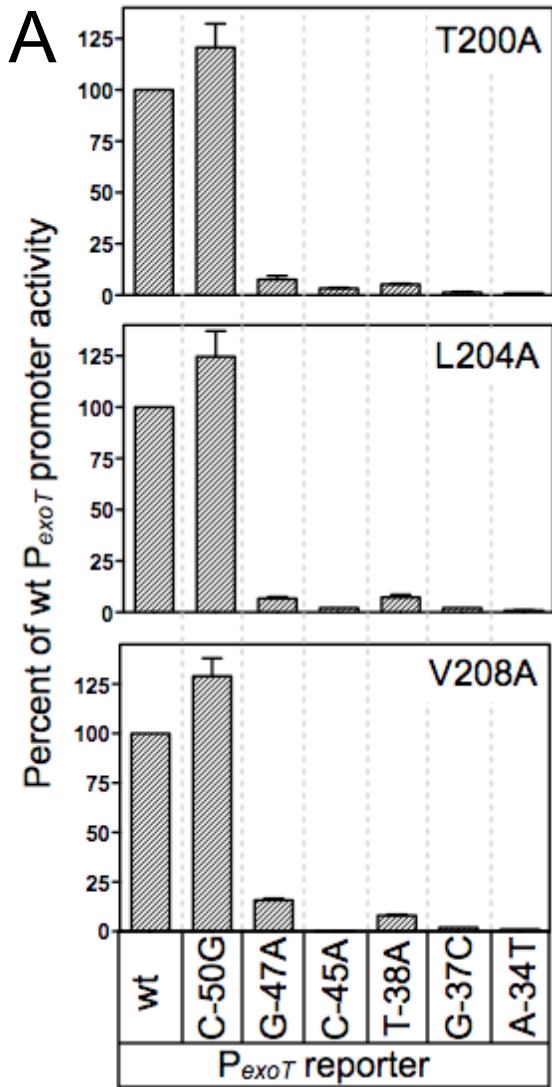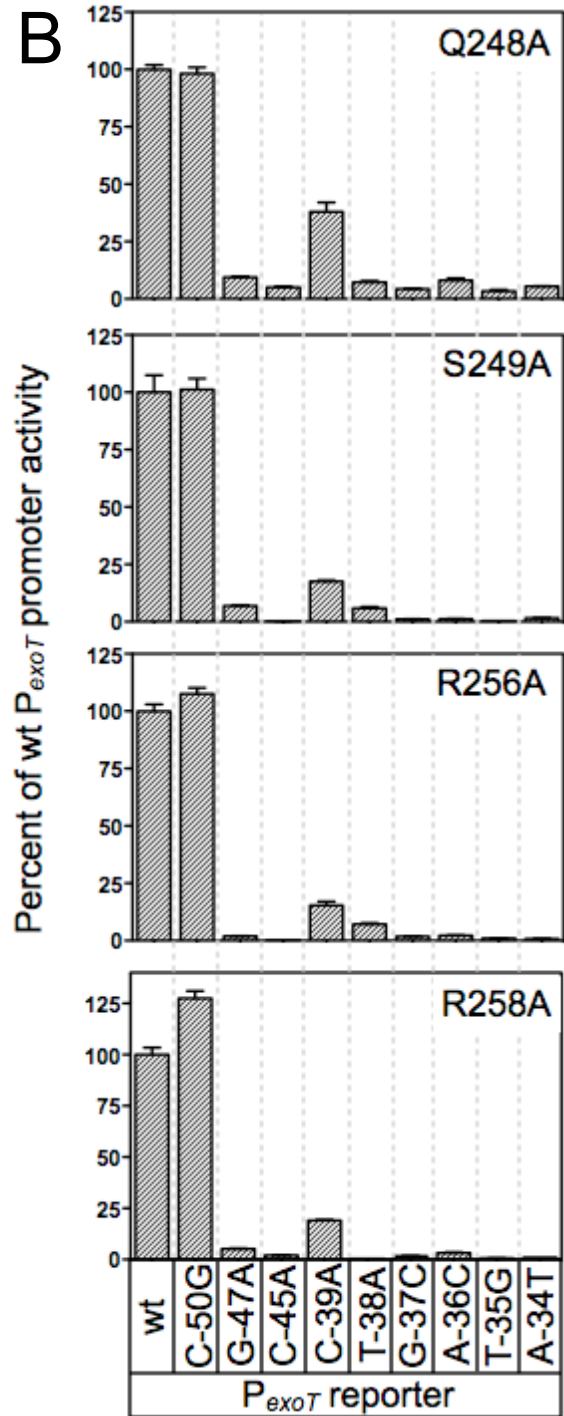

Figure S2

A

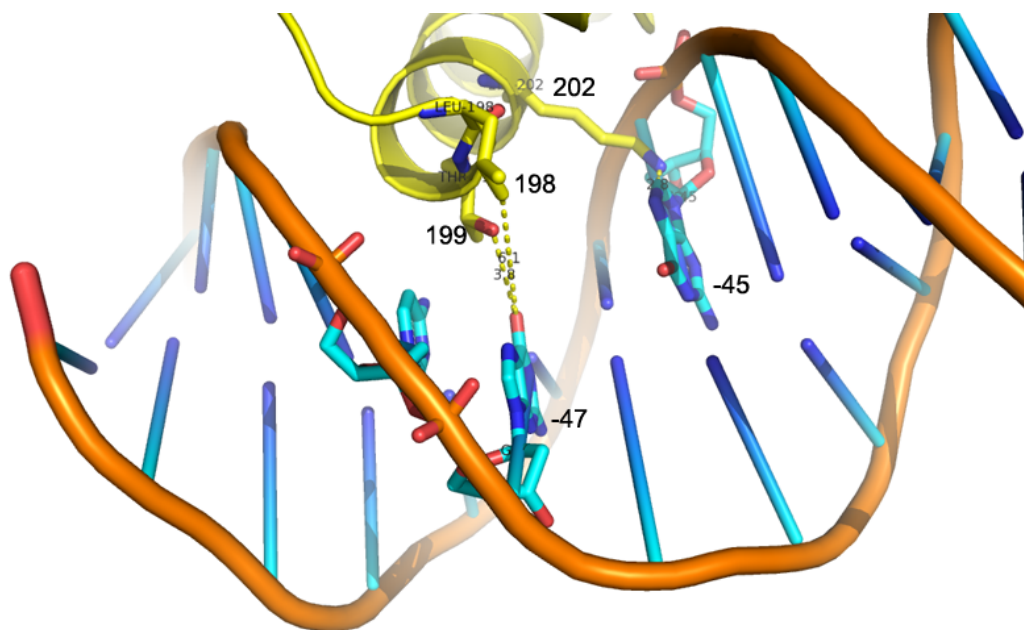

L198, T199, K202

B

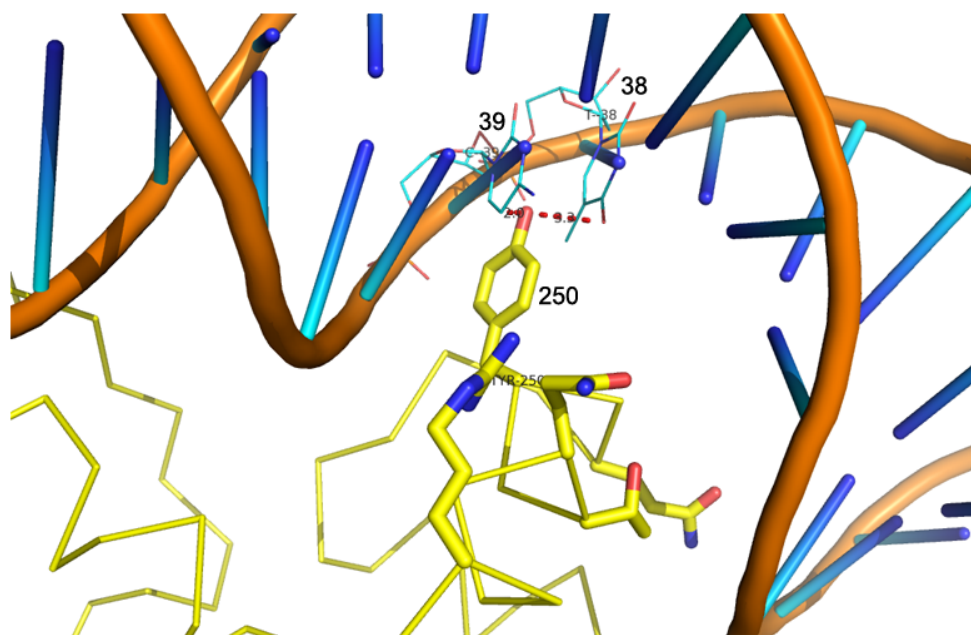

Y250

Figure S3

1 **Figure S1.** DNase I footprint of the  $P_{pcrG}$  promoter region. The  $P_{pcrG}$  promoter probe  
2 was end-labeled with  $^{32}\text{P}$  on the reverse strand, incubated in the absence (-) or  
3 presence of ExsA<sub>His</sub>, and treated with DNase I as previously described (6). The  
4 reactions were separated by denaturing polyacrylamide gel electrophoresis and  
5 visualized by phosphorimaging. Maxam-Gilbert sequencing ladders (A+G) were  
6 included for orientation and the positions of the GnC and TGnnA sequences in ExsA  
7 binding site 1 are indicated. The promoter region protected by ExsA<sub>His</sub> from DNase I  
8 cleavage is indicated with a solid on the right side of the phosphorimage. Nucleotides  
9 demonstrating hypersensitivity to DNase I cleavage are indicated with an asterisk.

10

11 **Figure S2.** Residues T200A, L204A, V208A, Q248A, S249A, R256A, and R258A show  
12 no loss-of-contact phenotype. PA1O3 *exsA::Ω* expressing the indicated ExsA mutants  
13 were assayed for reporter activity using the panel of mutant  $P_{exoT-lacZ}$  reporter described  
14 in Fig. 4A. The strains were cultured in the presence of EGTA and 0.1% arabinose, and  
15 assayed for  $\beta$ -galactosidase activity. The reported values are the percent activity at the  
16 mutant promoter compared to the activity at the wt  $P_{exoT-lacZ}$  reporter.

17

18 **Figure S3.** Molecular modeling the interaction of ExsA with the  $P_{exoT}$  promoter.

19
